# Supplementary material for: Development and validation of an individualized gene expression-based signature to predict overall survival of patients with high-grade serous ovarian carcinoma
Source: Springer Nature journal article supplement (doi:10.1186/s40001-023-01376-0), 2023-10-27

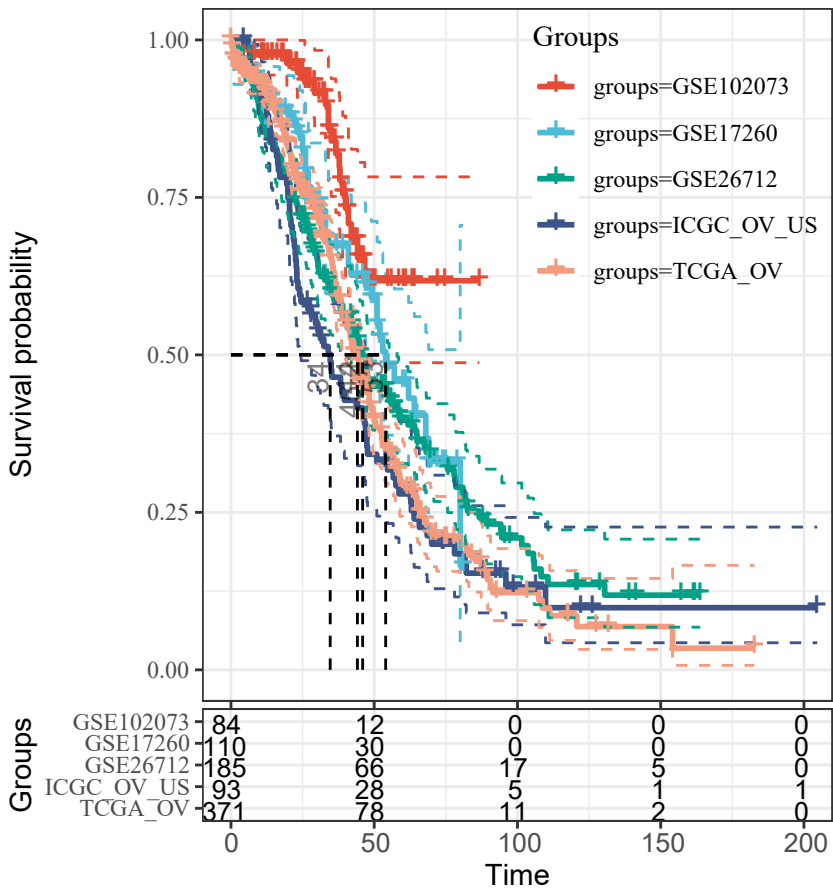

Supplement: MOESM1 [file 26232400]
